# Supplementary material
Source: Elsevier journal article supplement (https://publikationen.ub.uni-frankfurt.de/opus4/files/44261/mmc1.zip)
Supplement: mmc1 [file mmc1.zip]

Archive with 6 entries (6 files):
- dib/dib_data article template_for other journals.docx
- dib/dib_Figure 1.tif
- dib/dib_Figure 2.tif
- dib/dib_Figure 3.tif
- dib/dib_Figure 4.tif
- dib/dib_Figure 5.tif
