# Supplementary material
Source: Elsevier journal article supplement (https://publikationen.ub.uni-frankfurt.de/opus4/files/44261/mmc1.zip)

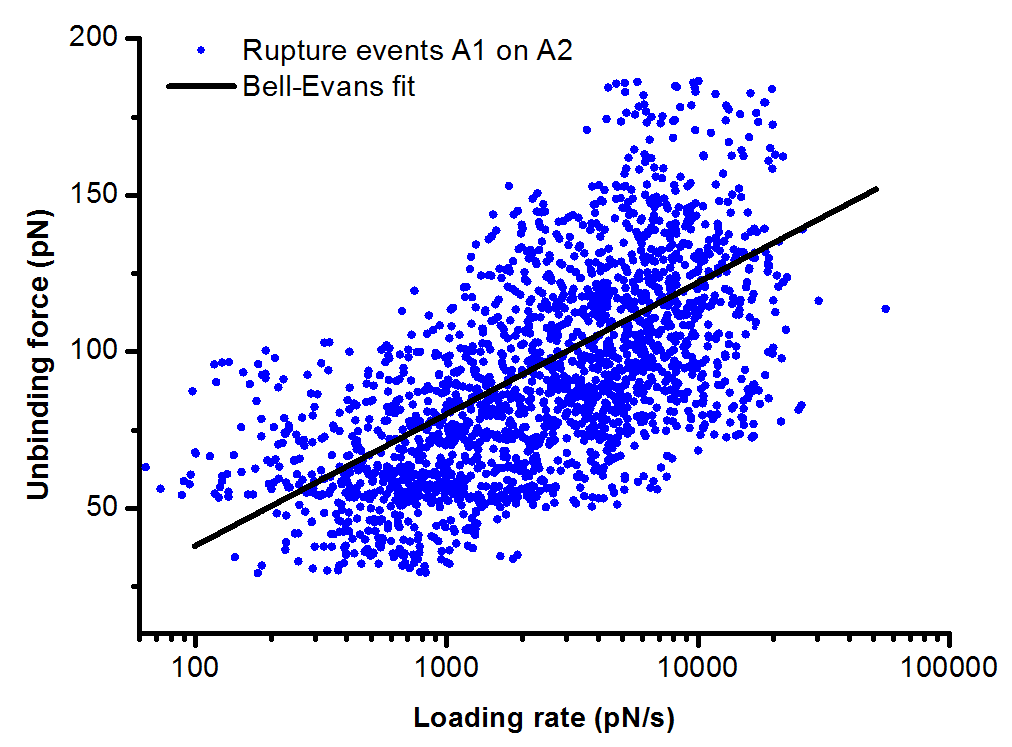

Supplement: mmc1 [file mmc1.zip › dib/dib_Figure 3.tif]

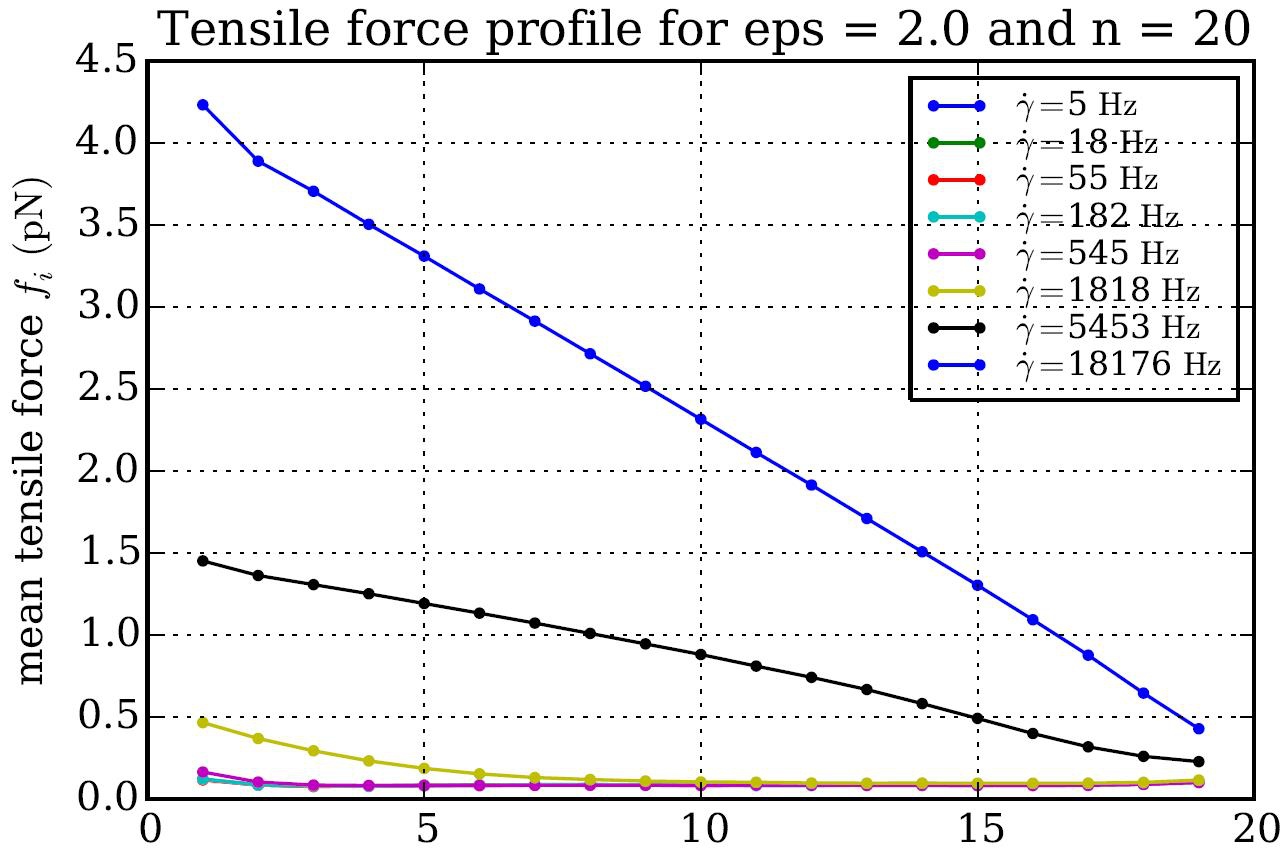

Supplement: mmc1 [file mmc1.zip › dib/dib_Figure 4.tif]

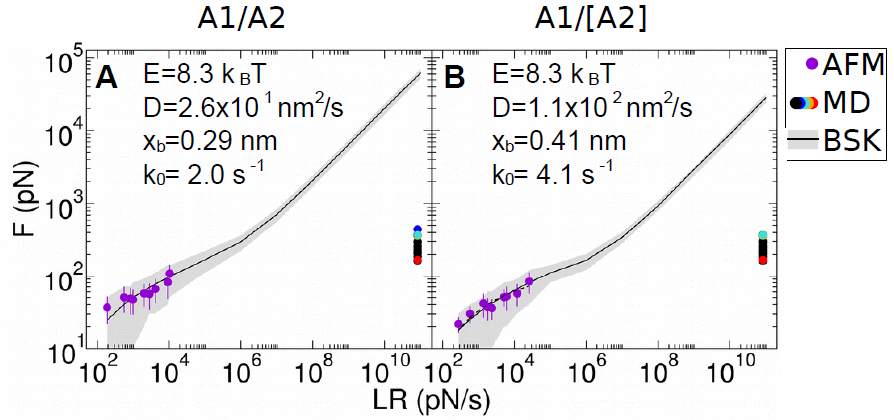

Supplement: mmc1 [file mmc1.zip › dib/dib_Figure 5.tif]
